# Supplementary material for: Family Involvement in Psychiatric Hospitalizations: Associations With Discharge Planning and Prompt Follow-Up Care
Source: Atypon-hosted journal article supplement (doi:10.1176/appi.ps.201900028), 2019-07-16
Supplement: appi.ps.201900028.ds001.pdf [file appi.ps.201900028.ds001.pdf]

 


Psychiatry Online
